# Supplementary material for: Characterization of surface and bulk nitrates of γ-Al2O3–supported alkaline earth oxides using density functional theory
Source: Royal Society of Chemistry journal article supplement (doi:10.1039/b819347a), 2009-01-01
Supplement: b819347a.pdf [file b819347a.pdf]

**Table S1** The calculated and experimental vibrational frequencies ( $\text{cm}^{-1}$ ) of “bulk” and “surface” nitrates. Only the frequencies ( $>1100 \text{ cm}^{-1}$ ) were listed.

|                                                | Substrate                                      | Adsorbate     | Structure A | Structure B | Experiment <sup>1</sup> |
|------------------------------------------------|------------------------------------------------|---------------|-------------|-------------|-------------------------|
| bulk nitrate                                   | $\gamma\text{-Al}_2\text{O}_3(100)$            | $\text{NO}_2$ | 1818, 1321  | 1737, 1236  |                         |
|                                                |                                                | $\text{NO}_3$ | 1561, 1198  | 1588, 1284  |                         |
|                                                | $\text{MgO}(001)$                              | $\text{NO}_2$ | 1680, 1259  | 1512, 1257  |                         |
|                                                |                                                | $\text{NO}_3$ | 1452, 1251  | 1261        |                         |
|                                                | $\text{CaO}(001)$                              | $\text{NO}_2$ | 1556, 1268  | 1546, 1260  | 1480, 1328              |
|                                                |                                                | $\text{NO}_3$ | 1374, 1343  | 1484, 1269  |                         |
| $\text{SrO}(001)$                              | $\text{NO}_2$                                  | 1517, 1259    | 1501, 1247  | 1463, 1322  |                         |
|                                                | $\text{NO}_3$                                  | 1382, 1340    | 1468, 1272  |             |                         |
| surface nitrate                                | $\text{BaO}(001)$                              | $\text{NO}_2$ | 1450, 1240  | 1443, 1235  | 1440, 1320              |
|                                                |                                                | $\text{NO}_3$ | 1409, 1317  | 1476, 1261  |                         |
|                                                | $\text{MgO}/\gamma\text{-Al}_2\text{O}_3(100)$ | $\text{NO}_2$ | 1696, 1299  | 1585, 1227  | 1593, 1260              |
|                                                |                                                | $\text{NO}_3$ | 1596, 1214  | 1647, 1212  |                         |
|                                                | $\text{CaO}/\gamma\text{-Al}_2\text{O}_3(100)$ | $\text{NO}_2$ | 1575, 1230  | 1656, 1288  | 1582, 1280              |
|                                                |                                                | $\text{NO}_3$ | 1607, 1210  | 1572, 1205  |                         |
| $\text{SrO}/\gamma\text{-Al}_2\text{O}_3(100)$ | $\text{NO}_2$                                  | 1576, 1231    | 1634, 1282  | 1580, 1287  |                         |
|                                                | $\text{NO}_3$                                  | 1589, 1220    | 1554, 1207  |             |                         |
| $\text{BaO}/\gamma\text{-Al}_2\text{O}_3(100)$ | $\text{NO}_2$                                  | 1565, 1232    | 1600, 1275  | 1577, 1310  |                         |
|                                                | $\text{NO}_3$                                  | 1574, 1219    | 1545, 1207  |             |                         |

**Table S2** The calculated and experimental vibrational frequencies ( $\text{cm}^{-1}$ ) of cubic bulk AE nitrates.

| Bulk Nitrate               | Calculations                                       | Experiments                                               |
|----------------------------|----------------------------------------------------|-----------------------------------------------------------|
| $\text{Mg}(\text{NO}_3)_2$ | 1463, 1430, 1426, 1398, 1380, 1364, 1096, 767, 732 | 1467, 1376, 1328, 1070, 1063, 1049, 748, 732 <sup>a</sup> |
| $\text{Ca}(\text{NO}_3)_2$ | 1432, 1423, 1413, 1406, 1372, 1362, 1064, 780, 720 | 1488, 1455, 1360, 813, 743 <sup>b</sup>                   |
| $\text{Sr}(\text{NO}_3)_2$ | 1420, 1414, 1406, 1395, 1365, 1354, 1051, 780, 715 | 1477, 1439, 1360, 1055, 815, 738 <sup>b</sup>             |
| $\text{Ba}(\text{NO}_3)_2$ | 1398, 1396, 1387, 1380, 1354, 1344, 1043, 782, 710 | 1462, 1415, 1345, 818, 730 <sup>b</sup>                   |

(a) Experimental data from reference<sup>2</sup>. The frequencies of  $\text{Mg}(\text{NO}_3)_2 \cdot 2\text{H}_2\text{O}$  was used for comparison.

(b) Experimental data from reference<sup>3</sup>

1. C. Verrier, J. H. Kwak, D. H. Kim, C. H. F. Peden and J. Szanyi, *Catal. Today*, 2008, **136**, 121-127.
2. X. H. Li, L. J. Zhao, J. L. Dong, H. S. Xiao and Y. H. Zhang, *J. Phys. Chem. B*, 2008, **112**, 5032-5038.
3. M. H. Brooker and J. B. Bates, *Spectroc. Acta Pt. A-Molec. Biomolec. Spectr.*, 1973, **A 29**, 439-452.
